# Supplementary material for: Rapid Acidification and Off-Flavor Reduction of Pea Protein by Fermentation with Lactic Acid Bacteria and Yeasts
Source: MDPI journal article supplement (doi:10.3390/foods13040588), 2024-02-15
Supplement: s1 [file s1]

### **Supplementary Material**

**Table S1.** Concentration ( $\mu\text{g/L}$ ) of aroma compounds in acidified pea protein suspension with a final pH-value of 4.3.

| <b>Compound</b>               | <b>Acidified Control Sample</b> |
|-------------------------------|---------------------------------|
| Decanal                       | $0.8 \pm 0.1$                   |
| Heptanal                      | $141.4 \pm 4.5$                 |
| Nonanal                       | $1.5 \pm 0.1$                   |
| ( <i>E</i> )-2-Octenal        | $2.6 \pm 0.3$                   |
| 1-Octen-3-ol                  | $9.6 \pm 0.3$                   |
| 2-Nonanone                    | $4.8 \pm 0.1$                   |
| 2-Pentylfuran                 | $321.1 \pm 15.5$                |
| Hexanal                       | $666.6 \pm 22.2$                |
| ( <i>E,E</i> )-2,4-Decadienal | $0.3 \pm 0.0$                   |
| Ethyl hexanoate               | $0.3 \pm 0.0$                   |
| 1-Hexanol                     | $39.5 \pm 1.1$                  |
| Isoamyl acetate               | $0.0 \pm 0.0$                   |
| 2-Methylfuran                 | $2.4 \pm 0.2$                   |
| 1-Octanol                     | $2.8 \pm 0.5$                   |
| 2-Isobutyl-3-methoxypyrazine  | $0.4 \pm 0.2$                   |
